# Supplementary material for: The intragenic epistatic association of ADD3 with biliary atresia in Southern Han Chinese population
Source: PubMed Central journal article supplement (PMC5997795; doi:10.1042/bsr20171688), 2018-06-12
Supplement: bsr20171688_Supp1.pdf [file bsr20171688_Supp1.pdf]

**Supplementary Figure 1.** The LD ( $r^2$ ) patterns of five SNPs in *ADD3* in Chinese from Beijing and Southern (CHB\_CHS) and Utah residents with ancestry from northern and western Europe (CEU). The LD patterns of rs17095355, rs10509906, rs2501577, rs6584970 and rs7086057 between (CHB\_CHS) and CEU populations are similar, which are slightly different with the LD pattern of rs17095355 in CHB\_CHS populations, reflecting the potential population difference.

*Add3*

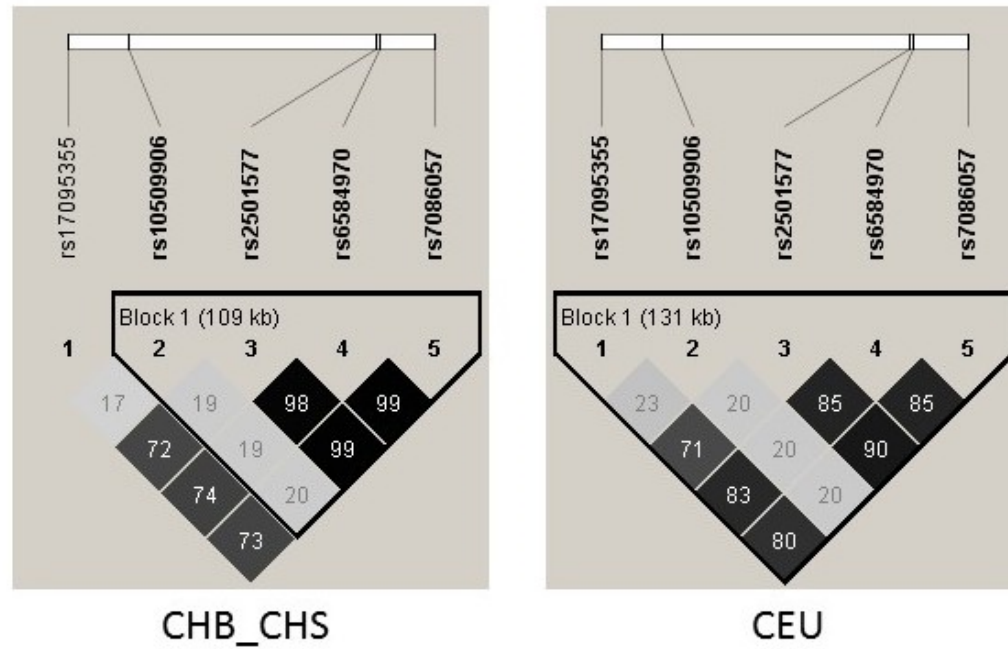

**Supplementary Figure 2.** SNP rs17095355 played as an expression quantitative locus (eQTL) with *ADD3* across different tissues in human, especially in Central nervous system using GTEX tool (<https://www.gtexportal.org/home/>)

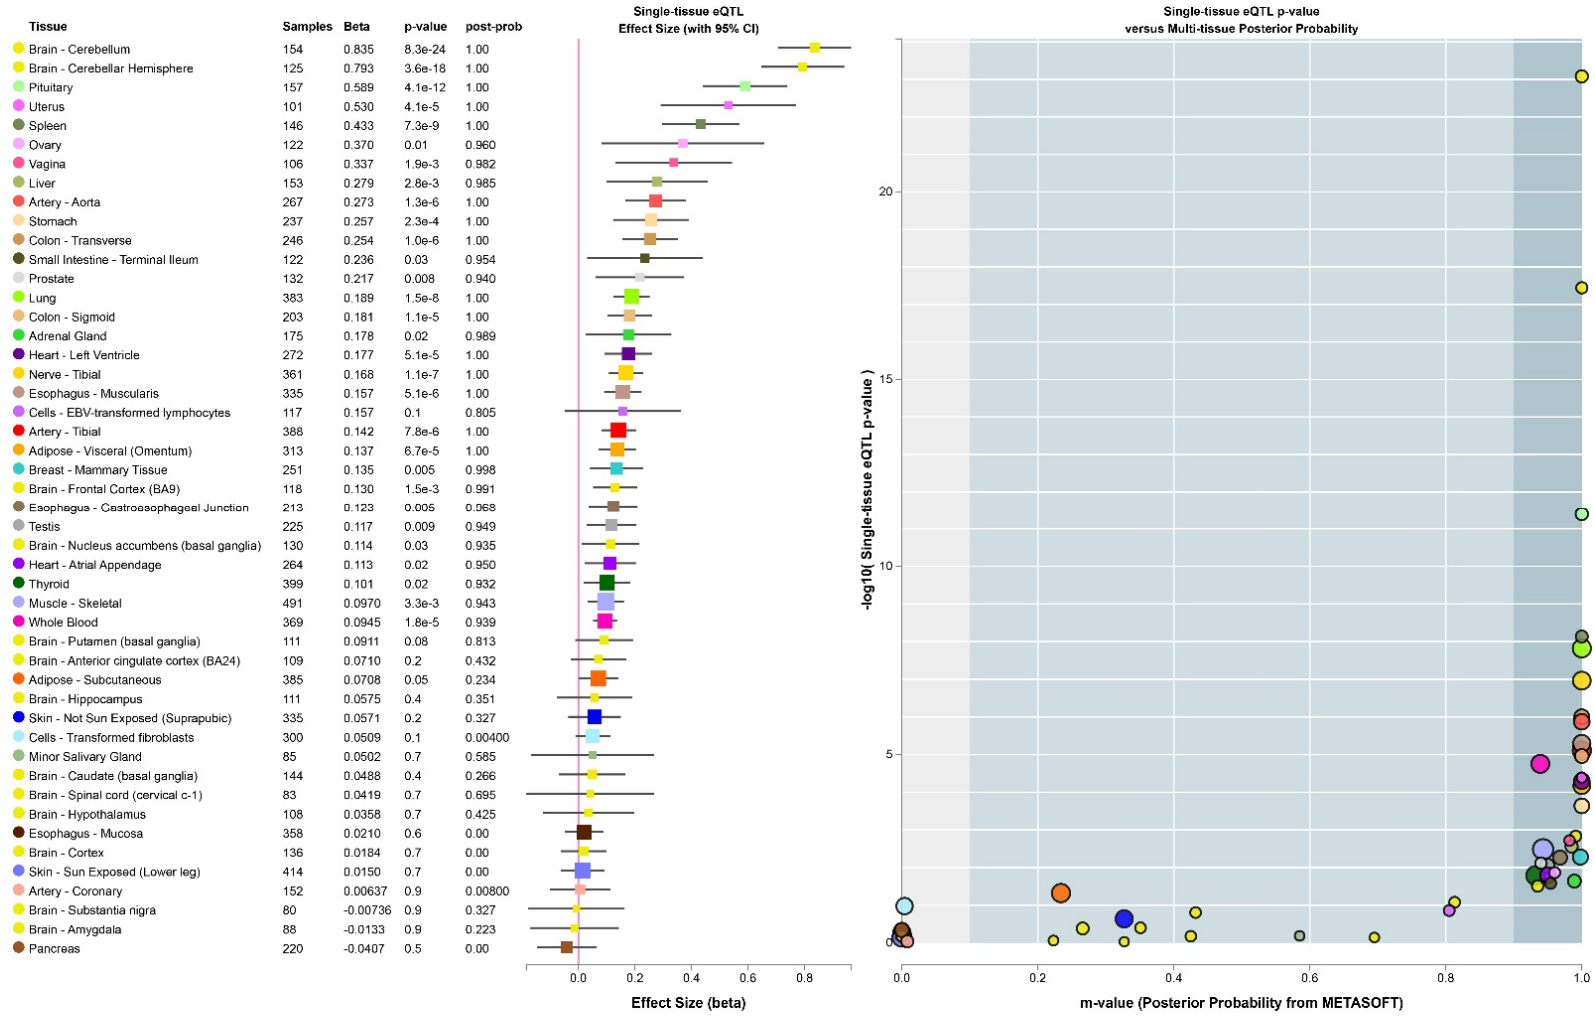

**Supplementary Figure 3.** SNP rs10509906 played as an expression quantitative locus (eQTL) with *ADD3* across different tissues in human, especially in Central nervous system using GTEX tool (<https://www.gtexportal.org/home/>).

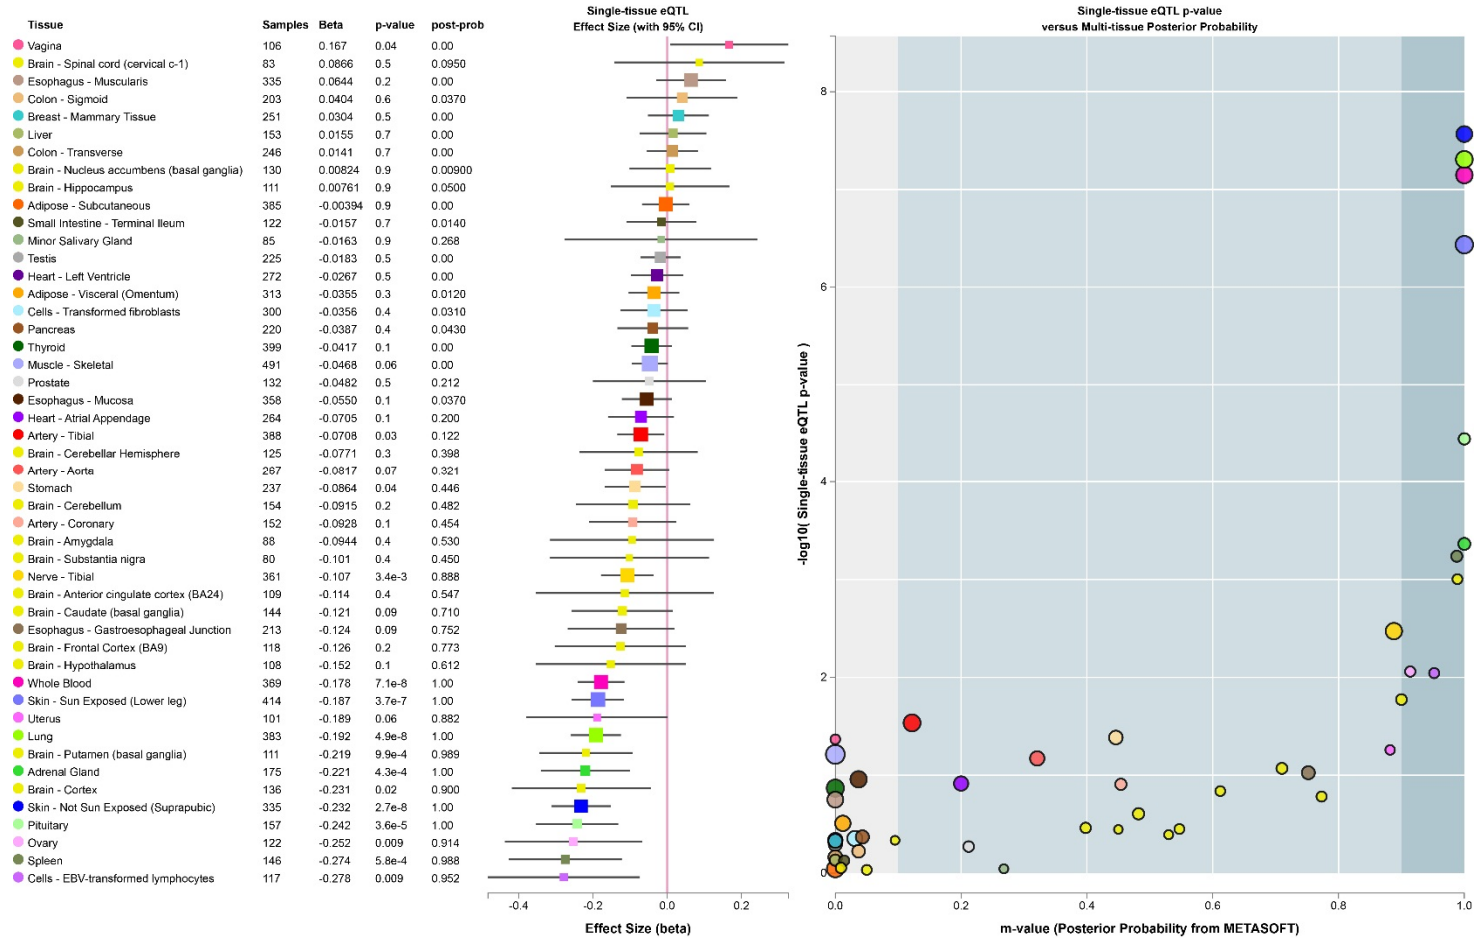

**Supplementary Figure 4.** SNP rs2501577 played as an expression quantitative locus (eQTL) with *ADD3* across different tissues in human, especially in Central nervous system using GTEX tool (<https://www.gtexportal.org/home/>).

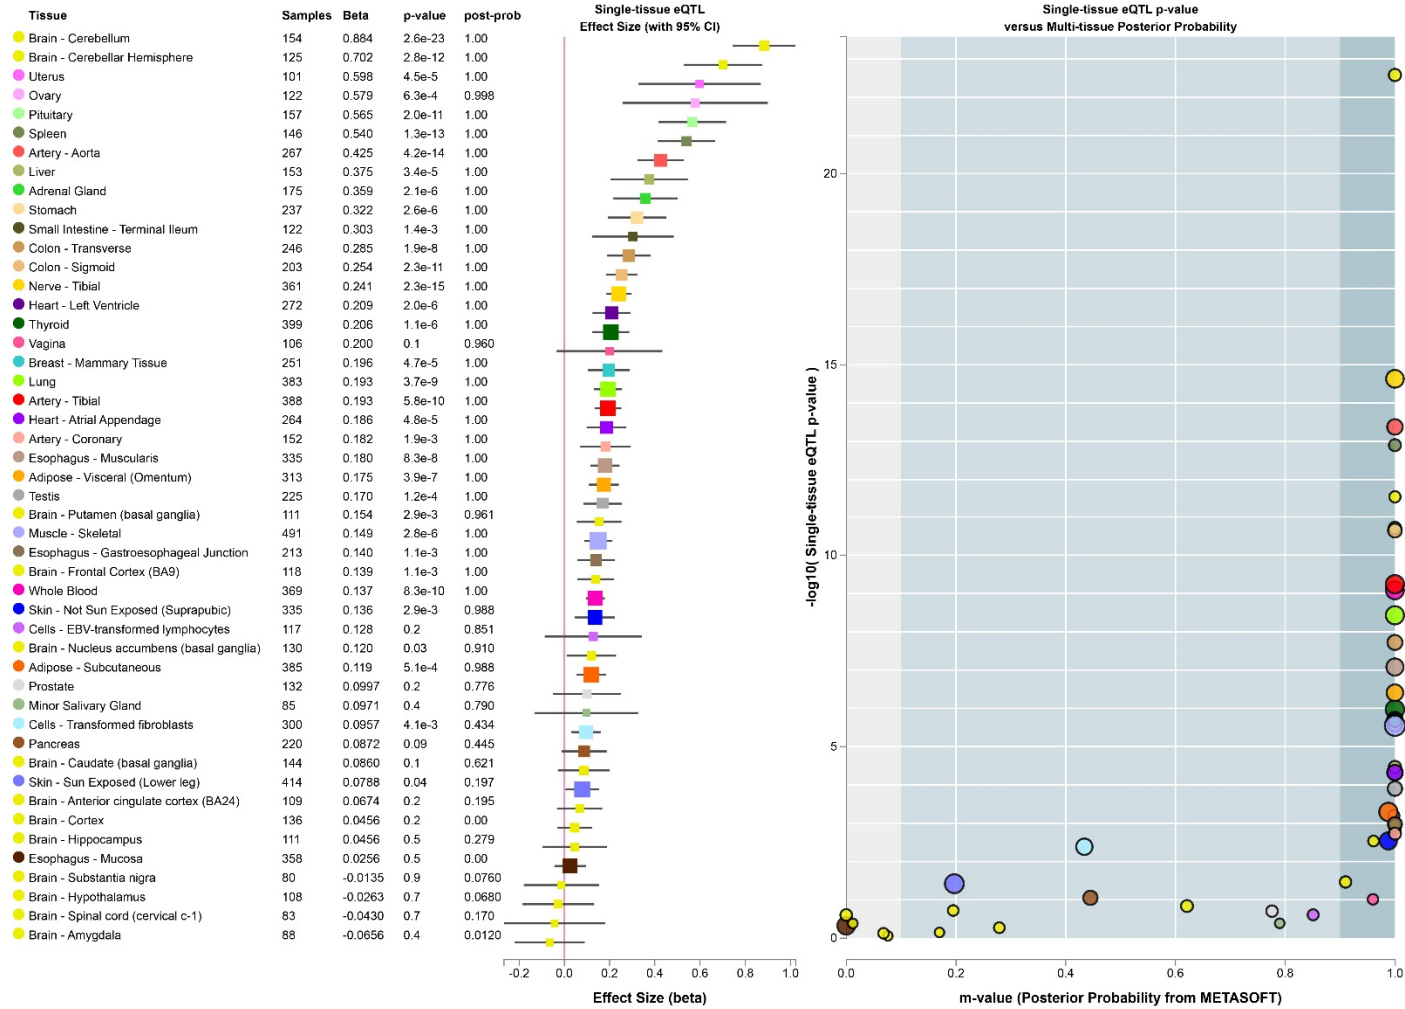

**Supplementary Table 1. Annotation of five SNP of ADD3 identified by Cheng et al using Regulome DB.**

| #chromosome | rsid       | hits                                                                                                                                                                                                           | score* |
|-------------|------------|----------------------------------------------------------------------------------------------------------------------------------------------------------------------------------------------------------------|--------|
| chr10       | rs17095355 | Chromatin_Structure   DNase-seq Hrpe, Chromatin_Structure   DNase-seq Werirb1, Chromatin_Structure   DNase-seq H7es                                                                                            | 5      |
| chr10       | rs2501577  | Motifs PWM   RUNX3, Chromatin_Structure   DNase-seq Tregwb83319432                                                                                                                                             | 5      |
| chr10       | rs6584970  | Motifs PWM   RFX1, Motifs PWM   Nanog, Chromatin_Structure   DNase-seq Fibrobl, Chromatin_Structure   DNase-seq Th2                                                                                            | 5      |
| chr10       | rs10509906 | Motifs Footprinting H1_ES Sp1, Motifs Footprinting GM12892 RREB1, Motifs Footprinting Lymphoblastoid RREB1, Motifs Footprinting K562 RREB1, Motifs Footprinting HUVEC RREB1, Motifs Footprinting GM12891 RREB1 | 6      |
| chr1        | rs708605   | Motifs PWM   FOXP1                                                                                                                                                                                             | 6      |

score\* :The smaller the annotation number of the SNP, the more likely of the SNP to be functional regulated.

**Supplementary Table 2. Detailed clinical information of the subjects in this study**

|                   | Age range<br>( Months ) | Age<br>≤3 | Age<br>>3 | Females | Males  | Cystic biliary<br>atresia<br>( CBA ) | non-CBA |
|-------------------|-------------------------|-----------|-----------|---------|--------|--------------------------------------|---------|
| Cases (n=506)     | 2.088±1.934             | 470       | 36        | 214     | 292    | 44                                   | 462     |
| %                 |                         | 92.89%    | 7.11%     | 42.29%  | 57.71% | 8.70%                                | 91.30%  |
| Controls (n=1473) | 18.61±19.75             | 521       | 952       | 44      | 462    |                                      |         |
|                   |                         | 35.37%    | 64.63%    | 8.70%   | 91.30% |                                      |         |
